# Supplementary material for: The fate of 13C-labelled and non-labelled inulin predisposed to large bowel fermentation in rats
Source: Royal Society of Chemistry journal article supplement (doi:10.1039/c5fo01056j), 2016-01-01
Supplement: c5fo01056j1.pdf [file c5fo01056j1.pdf]

## Supplementary data

**Table S1.** Body weight and food intake in rats fed experimental diets.

| Diet                           | Day | Initial body weight | Daily weight gain (weight gain/days on diet) | Average food intake per day |
|--------------------------------|-----|---------------------|----------------------------------------------|-----------------------------|
| Cellulose                      | 4   | 55.7                | –                                            | –                           |
| Cellulose                      | 5   | 57.3                | 4.1                                          | 9.8                         |
| Cellulose                      | 6   | 57.2                | 3.8                                          | 8.9                         |
| Cellulose                      | 7   | 56.1                | 3.8                                          | 9.0                         |
| Cellulose                      | 10  | 59.0                | 3.6                                          | 9.8                         |
| Cellulose                      | 11  | 55.0                | 4.0                                          | 9.7                         |
| Inulin                         | 4   | 54.3                | –                                            | –                           |
| Inulin                         | 5   | 56.3                | 4.4                                          | 9.6                         |
| Inulin                         | 6   | 58.1                | 4.4                                          | 9.6                         |
| Inulin                         | 7   | 56.0                | 3.8                                          | 8.9                         |
| Inulin                         | 10  | 58.0                | 3.7                                          | 9.1                         |
| Inulin                         | 11  | 56.1                | 4.0                                          | 9.8                         |
| LSD <sup>a</sup>               |     | 4.1                 | 1.2                                          | 0.9                         |
| df <sup>b</sup>                |     | 22                  | 18                                           | 18                          |
| <i>P</i> values                |     |                     |                                              |                             |
| Diet (1 df)                    |     | 0.762               | 0.490                                        | 0.476                       |
| Day (5 df) <sup>c</sup>        |     | 0.155               | 0.599                                        | 0.431                       |
| Diet × Day (5 df) <sup>c</sup> |     | 0.911               | 0.937                                        | 0.494                       |

Body weight, body weight gain and food intake are expressed in grams (g).

<sup>a</sup>LSD – Least significant difference between two means at the 5% level.

<sup>b</sup>df – Degrees of freedom.

<sup>c</sup>The df for the day and diet × day effects for daily weight gain and average food intake per day is 4.
